# Supplementary material for: Field-induced slow magnetic relaxation and luminescence thermometry in a mononuclear ytterbium complex
Source: Royal Society of Chemistry journal article supplement (doi:10.1039/d0qi00637h), 2020-01-01
Supplement: d0qi00637h1.pdf [file d0qi00637h1.pdf]

## Supporting Information

### Field-Induced slow magnetic relaxation and luminescence thermometry in a mononuclear ytterbium complex

Matilde Fondo,<sup>a,\*</sup> Julio Corredoira-Vázquez,<sup>a</sup> Ana M. García-Deibe,<sup>a</sup> Jesús Sanmartín-Matalobos,<sup>a</sup> Martín Amoza,<sup>a</sup> Alexandre M. P. Botas,<sup>b</sup> Rute A. S. Ferreira,<sup>b</sup> Luís D. Carlos<sup>b,\*</sup> Enrique Colacio<sup>c</sup>

<sup>a</sup> Departamento de Química Inorgánica, Facultade de Química, Universidade de Santiago de Compostela, Campus Vida, 15782 Santiago de Compostela, Spain.

<sup>b</sup> Phantom-g, CICECO – Aveiro Institute of Materials, Department of Physics, University of Aveiro, 3810-193 – Aveiro, Portugal

<sup>c</sup> Departamento de Química Inorgánica, Facultad de Ciencias, Universidad de Granada, Avda Fuentenueva s/n, 18071 Granada, Spain

- Figure S1.** TGA for **1·2MeOH** S3
- Figure S2.** Comparative powder X-ray diffractograms for **1·2MeOH**. Red: experimental diffractogram for the microcrystalline sample; green: calculated diffractogram using the data obtained from single X-ray diffraction studies. S3
- Figure S3** Left) Frequency dependence of  $\chi_M''$  for **1·2MeOH** at 2.5 K in various applied fields. Right) Field dependence of the magnetic relaxation time at 2.5 K for **1·2MeOH**. S4
- Figure S4.** Frequency dependence of  $\chi_M'$  for **1·2MeOH** ( $H_{ac} = 10$  Oe) in  $H_{dc} = 1600$  Oe at different temperatures. S4
- Figure S5.** Cole–Cole plot for **1·2MeOH** in  $H_{dc} = 1600$  Oe. S4
- Figure S6.** Arrhenius plot for **1·2MeOH** in a dc applied field of 1600 Oe showing the Raman, Direct and combination of Raman-Direct fits. S5
- Figure S7.** Time-resolved emission spectra (acquired at 15 K excited at 360 nm) for starting delays of 0.01 (red line) and 0.02 ms (blue line). The emission spectrum measured in steady-state mode was scaled and is also shown for comparison. S5
- Figure S8.** Integrated intensity of areas  $I_1$  (A) and  $I_2$  (B). S6
- Figure S9.** Different views of the orientation of the main magnetic axis (Z) of the ground KD on  $Yb^{III}$  for **1·2**. S7

**Figure S10.** Estimation of the probability for different relaxation mechanisms of the spin between the two lowest energy KDs (black lines) in **1.2**: QTM and TA-QTM (green arrows); spin-phonon relaxation pathways (red and purple arrows). The values close to the arrows indicate the matrix elements of the transition magnetic moments. When this value is above 0.1 an efficient spin relaxation mechanism is expected. S7

**Table S1.** Main bond distances and angles for **1.2**MeOH. S8

**Table S2.** Crystal data and structure refinement for **1.2**MeOH.

**Table S3.** SHAPE v2.1. Continuous Shape Measures calculation (c) 2013 Electronic Structure Group, Universitat de Barcelona S9

**Table S4.** Some magnetic and structural information for field-induced Yb SIMs. S10-S11

**Table S5.** Energy ( $E$ ,  $\pm 5$  cm<sup>-1</sup>) and full-width-at-half maximum ( $fwhm$ ,  $\pm 5$  cm<sup>-1</sup>) of the <sup>2</sup>F<sub>5/2</sub>→<sup>2</sup>F<sub>7/2</sub> Stark components (identified from 1-4 and 1'-4') determined from the experimental emission spectrum (acquired at 11 K and excited at 360 nm) best fit ( $r^2 > 0.99$ ) using a 8-components Gaussian function for **1.2**MeOH. S12

**Table S6.** Comparison of the energy differences obtain by electronic structure calculations (RASSCF/RASSI) and the luminescence studies (all in cm<sup>-1</sup>). S12

**Table S7.** M<sub>J</sub> Composition of the KD for **1.1** and **1.2** (all in %). S12

**Table S8.** Generalised Debye model fitting parameters for **1.2**MeOH S13

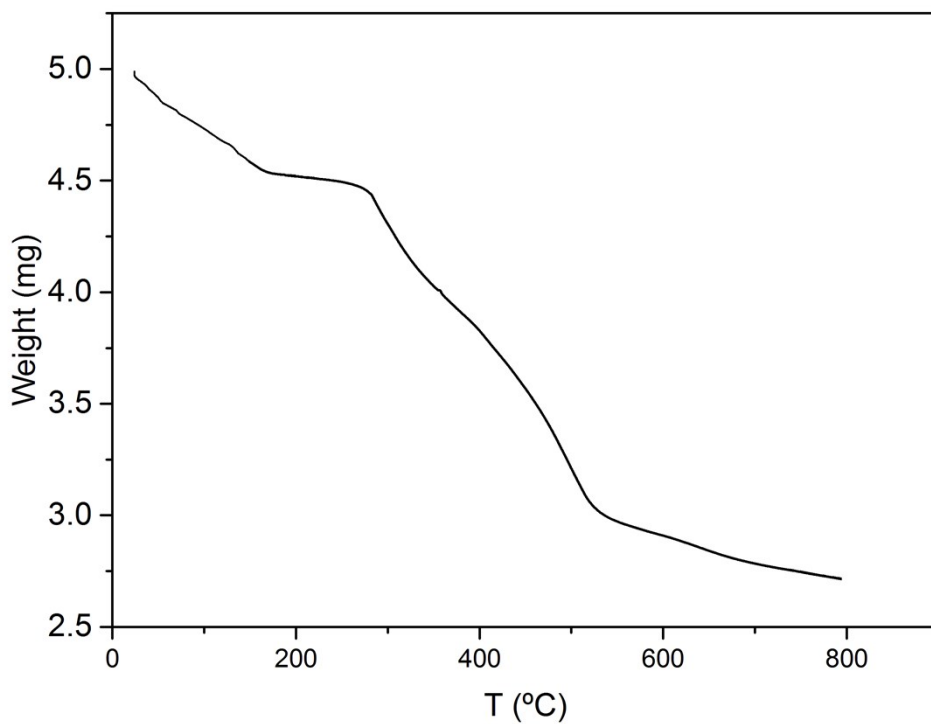

**Figure S1.** TGA for 1·2MeOH.

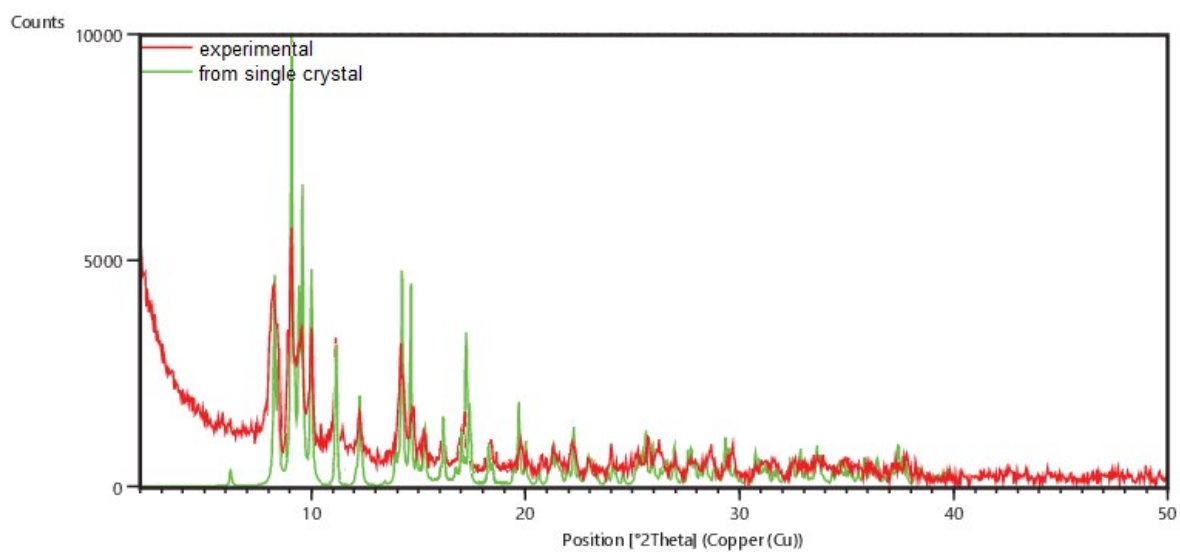

**Figure S2.** Comparative powder X-ray diffractograms for 1·2MeOH. Red: experimental diffractogram for the microcrystalline sample; green: calculated diffractogram using the data obtained from single X-ray diffraction studies.

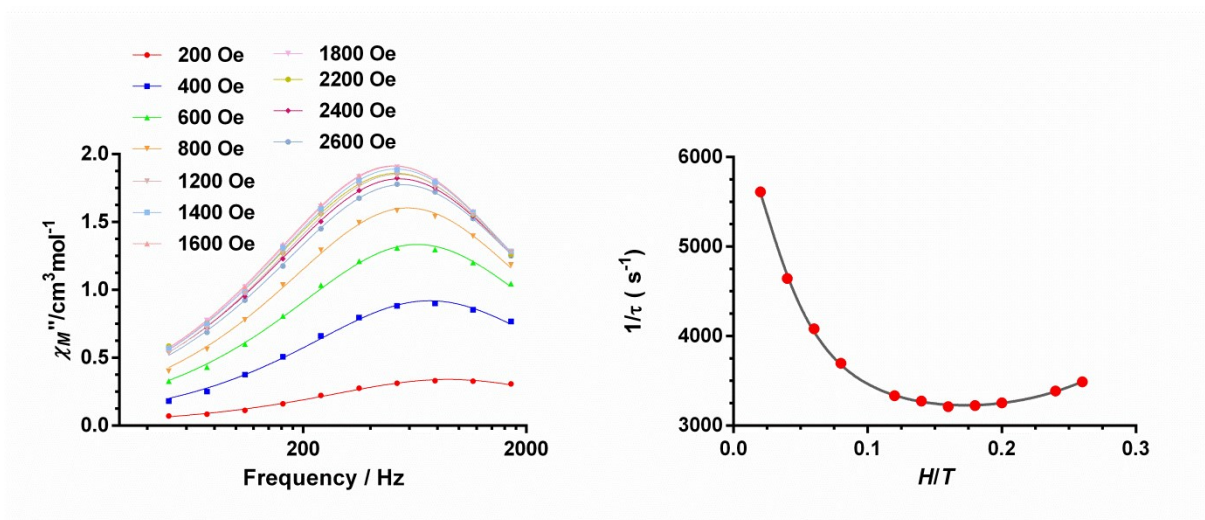

**Figure S3** Left) Frequency dependence of  $\chi_M''$  for 1·2MeOH at 2.5 K in various applied fields. Right) Field dependence of the magnetic relaxation time at 2.5 K for 1·2MeOH.

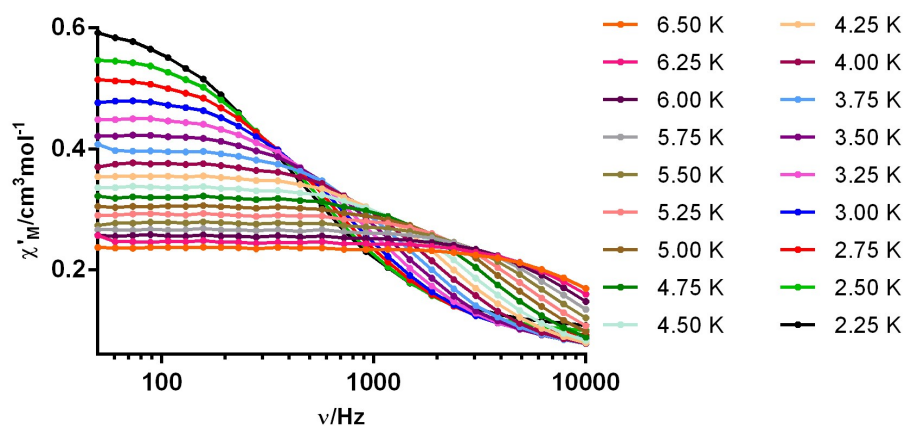

**Figure S4.** Frequency dependence of  $\chi_M'$  for 1·2MeOH ( $H_{ac} = 10$  Oe) in  $H_{dc} = 1600$  Oe at different temperatures.

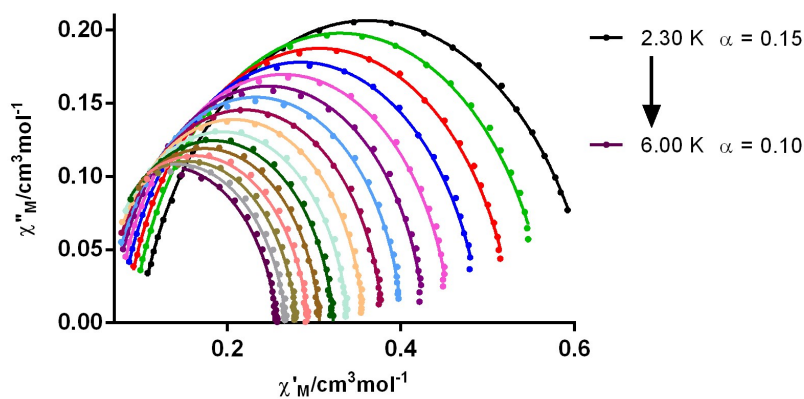

**Figure S5.** Cole–Cole plot for 1·2MeOH in  $H_{dc} = 1600$  Oe.

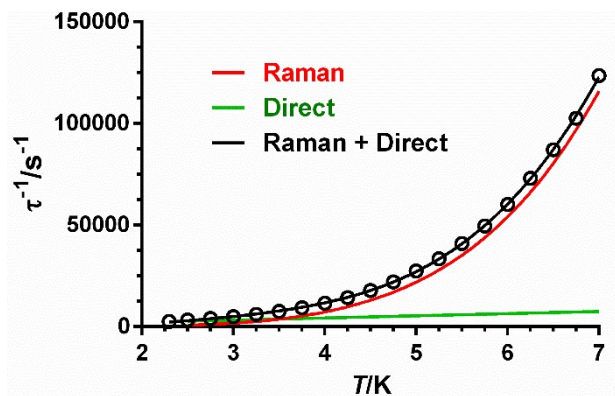

**Figure S6.** Arrhenius plot for 1·2MeOH in a dc applied field of 1600 Oe showing the Raman, Direct and combination of Raman-Direct fits.

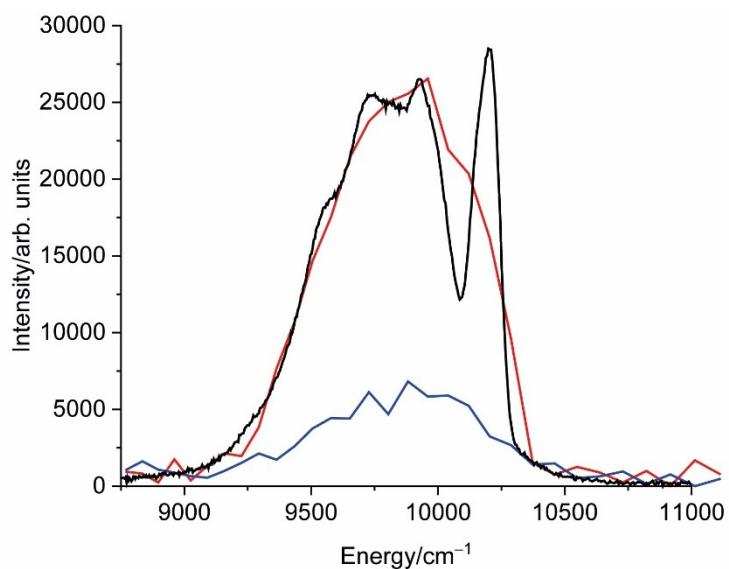

**Figure S7.** Time-resolved emission spectra (acquired at 15 K excited at 360 nm) for starting delays of 0.01 (red line) and 0.02 ms (blue line). The emission spectrum measured in steady-state mode was scaled and is also shown for comparison.

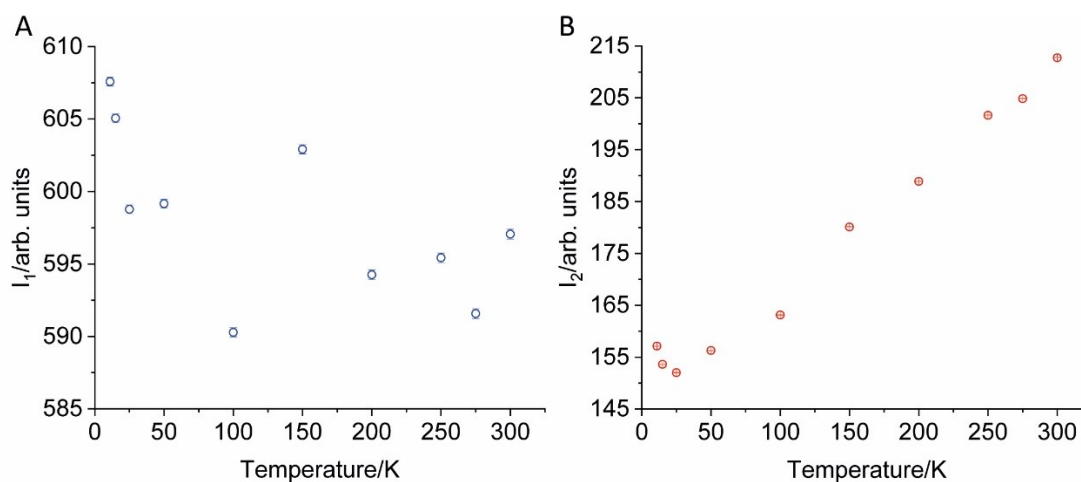

**Figure S8.** Integrated intensity of areas  $I_1$  (A) and  $I_2$  (B).

Temperature uncertainty ( $\delta\Delta$ ) associated to the thermal readouts was obtained considering the experimental uncertainty associated with the thermometric parameter as:

$$(\delta\Delta)^2 = \left(\frac{\partial\Delta}{\partial I_1} \delta I_1\right)^2 + \left(\frac{\partial\Delta}{\partial I_2} \delta I_2\right)^2 = \left(\frac{-I_1}{I_2^2} \delta I_2\right)^2 + \left(\frac{1}{I_2} \delta I_1\right)^2 \quad (S1)$$

where  $\delta I_1$  and  $\delta I_2$  are the uncertainties associated to of  $I_1$  and  $I_2$ , respectively.  $\delta I_1$  and  $\delta I_2$  were determined considering the standard error ( $SE = 5 \times 10^{-4}$ ) of the mean value of the noise signal of the spectrum (in the 10520-11111  $\text{cm}^{-1}$  spectral range):

$$SE = \frac{\sigma}{\sqrt{N}} \quad (S2)$$

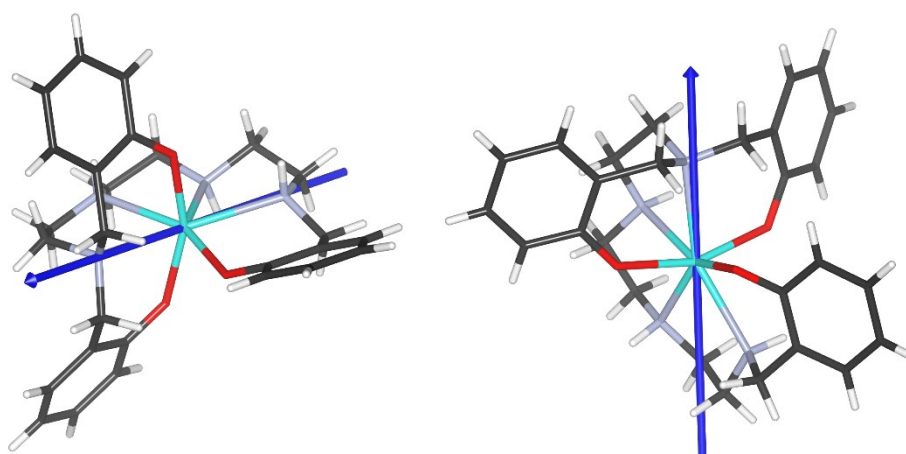

**Figure S9.** Different views of the orientation of the main magnetic axis (Z) of the ground KD on  $\text{Yb}^{\text{III}}$  for **1.2**.

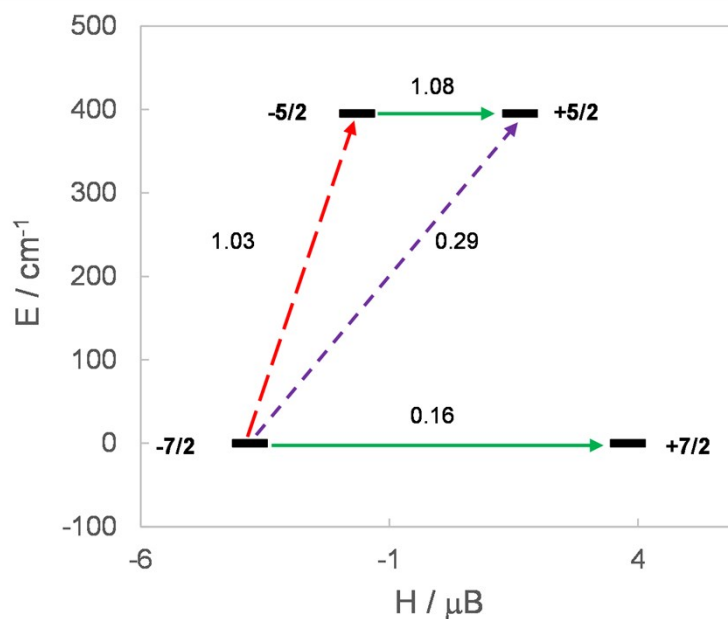

**Figure S10.** Estimation of the probability for different relaxation mechanisms of the spin between the two lowest energy KDs (black lines) in **1.2**: QTM and TA-QTM (green arrows); spin-phonon relaxation pathways (red and purple arrows). The values close to the arrows indicate the matrix elements of the transition magnetic moments. When this value is above 0.1 an efficient spin relaxation mechanism is expected.

**Table S1.** Main bond distances and angles for **1·2MeOH**.

|             | <b>1.1</b> |             | <b>1.2</b> |
|-------------|------------|-------------|------------|
| Yb1-O11     | 2.160(4)   | Yb2-O21     | 2.158(4)   |
| Yb1-O12     | 2.154(4)   | Yb2-O22     | 2.156(4)   |
| Yb1-O13     | 2.171(4)   | Yb2-O23     | 2.169(4)   |
| Yb1-N11     | 2.511(5)   | Yb2-N21     | 2.532(5)   |
| Yb1-N12     | 2.532(6)   | Yb2-N22     | 2.520(5)   |
| Yb1-N13     | 2.488(5)   | Yb2-N23     | 2.501(5)   |
| Yb1-N14     | 2.527(6)   | Yb2-N24     | 2.539(5)   |
| O12-Yb1-O11 | 160.46(17) | O22-Yb2-O21 | 159.83(16) |
| O13-Yb1-N11 | 83.40(16)  | O23-Yb2-N21 | 83.43(15)  |
| O13-Yb1-N14 | 75.03(17)  | O23-Yb2-N24 | 75.56(16)  |
| N11-Yb1-N12 | 67.68(18)  | N22-Yb2-N21 | 67.99(16)  |
| N13-Yb1-N12 | 68.18(19)  | N23-Yb2-N22 | 68.19(16)  |
| N13-Yb1-N14 | 68.6(2)    | N23-Yb2-N24 | 68.63(18)  |

**Table S2.** Crystal data and structure refinement for **1·2MeOH**.

|                                              |                                                                  |
|----------------------------------------------|------------------------------------------------------------------|
| Empirical formula                            | C <sub>29</sub> H <sub>41</sub> N <sub>4</sub> O <sub>5</sub> Yb |
| Molecular weight                             | 698.70                                                           |
| Crystal system                               | Orthorhombic                                                     |
| Space group                                  | <i>Pca</i> <sub>21</sub>                                         |
| Wavelength (Å)                               | 0.71073                                                          |
| Crystal size (mm <sup>3</sup> )              | 0.130 x 0.080 x 0.060                                            |
| Color, shape                                 | Plate, yellow                                                    |
| <i>T</i> (K)                                 | 100(2)                                                           |
| <i>a</i> (Å)                                 | 20.7775(19)                                                      |
| <i>b</i> (Å)                                 | 14.5382(13)                                                      |
| <i>c</i> (Å)                                 | 19.7229(16)                                                      |
| $\alpha$ (°)                                 | 90                                                               |
| $\beta$ (°)                                  | 90                                                               |
| $\gamma$ (°)                                 | 90                                                               |
| Volume (Å <sup>3</sup> )                     | 5957.6(9)                                                        |
| <i>Z</i>                                     | 8                                                                |
| Flack parameter                              | -0.016(3)                                                        |
| Absorpt. coef. (mm <sup>-1</sup> )           | 3.182                                                            |
| Reflections collected                        | 187658                                                           |
| Independent reflections                      | 14817 [R(int) = 0.0672]                                          |
| Data / restraints / param.                   | 14817 / 1 / 714                                                  |
| Flack parameter                              | -0.016(3)                                                        |
| Final R indices [ <i>I</i> > 2σ( <i>I</i> )] | R <sub>1</sub> = 0.0279<br>wR <sub>2</sub> = 0.0611              |
| R indices (all data)                         | R <sub>1</sub> = 0.0354<br>wR <sub>2</sub> = 0.0649              |



**Table S3.** SHAPE v2.1. Continuous Shape Measures calculation (c) 2013 Electronic Structure Group, Universitat de Barcelona

**Geometries Coordination number 7**

|         |       |                                         |
|---------|-------|-----------------------------------------|
| ETPY-7  | 7 C3v | Johnson elongated triangular pyramid J7 |
| JPBPY-7 | 6 D5h | Johnson pentagonal bipyramid J13        |
| CTPR-7  | 5 C2v | Capped trigonal prism                   |
| COC-7   | 4 C3v | Capped octahedron                       |
| PBPY-7  | 3 D5h | Pentagonal bipyramid                    |
| HPY-7   | 2 C6v | Hexagonal pyramid                       |
| HP-7    | 1 D7h | Heptagon                                |

**1·2MeOH**

**1.1**

|                 |         |         |               |        |               |         |        |
|-----------------|---------|---------|---------------|--------|---------------|---------|--------|
| Structure [ML7] | JETPY-7 | JPBPY-7 | <b>CTPR-7</b> | COC-7  | <b>PBPY-7</b> | HPY-7   | HP-7   |
|                 | 18.667, | 3.394,  | <b>2.974,</b> | 4.554, | <b>2.000,</b> | 21.373, | 31.806 |

**1.2**

|                 |         |         |               |        |               |         |        |
|-----------------|---------|---------|---------------|--------|---------------|---------|--------|
| Structure [ML7] | JETPY-7 | JPBPY-7 | <b>CTPR-7</b> | COC-7  | <b>PBPY-7</b> | HPY-7   | HP-7   |
|                 | 17.683, | 3.715,  | <b>2.726,</b> | 4.161, | <b>2.371,</b> | 21.202, | 31.646 |

**Table S4.** Some magnetic and structural information for field-induced Yb SIMs.

| Yb-SMM <sup>a</sup>                                                                   | $U_{eff}/K^c$ | $\tau_0/s$              | $H/Oe$ | <i>C. N. / Geometry</i> <sup>d</sup> | Best fit                | Ref. <sup>e</sup> |
|---------------------------------------------------------------------------------------|---------------|-------------------------|--------|--------------------------------------|-------------------------|-------------------|
| [Yb(H <sub>3</sub> L <sup>1</sup> ) <sub>2</sub> ]Cl <sub>3</sub> <sup>b</sup>        | 5.76          | 2.0 X 10 <sup>-5</sup>  | 400    | 6 / OC                               | Raman-Direct            | 26                |
| Na[Yb(L <sup>2</sup> )(H <sub>2</sub> O)] <sup>a</sup>                                | 29            | 4.0 X 10 <sup>-7</sup>  | 1000   | 8 / SAPR                             | Orbach + Raman + Direct | 27                |
| [Yb(murex) <sub>3</sub> ] <sup>a</sup>                                                | 15.6          | 2.7 X 10 <sup>-6</sup>  | 2000   | 9 / CSAPR                            | nd                      | 15                |
| [Yb(tta) <sub>3</sub> (L <sup>3</sup> ) <sup>a</sup>                                  | 6             | 1.9 X 10 <sup>-5</sup>  | 1000   | 8 / SAPR                             | Orbach                  | 16                |
| [Yb(L <sup>4</sup> ) <sub>2</sub> ](NO <sub>3</sub> ) <sup>a</sup>                    | 5.37          | 1.0 X 10 <sup>-5</sup>  | 1000   | 8 / nd                               | Orbach                  | 28                |
| [Yb(L <sup>4</sup> )(tta) <sub>2</sub> ] <sup>a</sup>                                 | 16.1          | 1.8 X 10 <sup>-7</sup>  | 1000   | 8 / TDD                              | Orbach                  | 28                |
| [Yb(trensall)]                                                                        | 54.67         | 1.5 X 10 <sup>-8</sup>  | 2000   | 7 / CTPR                             | Raman-Direct            | 17                |
| [Yb(Tpz) <sub>2</sub> (Bpz)] <sup>a</sup>                                             | 1-2           | nd                      | 1000   | 9 / JTCTPR                           | Orbach-Raman            | 29                |
| [Cp*Yb(DAD)(THF)]                                                                     | 13.85         | 1.74 x 10 <sup>-6</sup> | 1500   | pseudo 4 / pseudo T                  | Orbach-Raman-Direct     | 30                |
| [Yb(L <sup>5</sup> ) <sub>3</sub> ] <sup>a</sup>                                      | 11.7          | 4.6 x 10 <sup>-6</sup>  | 1000   | 9 / CSAPR                            | Raman                   | 18                |
| [Yb(L <sup>5</sup> ) <sub>2</sub> (tmh)(CH <sub>3</sub> OH)] <sup>a</sup>             | 29.7          | 3.5 x 10 <sup>-7</sup>  | 1000   | 9 / CSAPR                            | Raman                   | 18                |
| [Yb(L <sup>5</sup> ) <sub>2</sub> (tta)(CH <sub>3</sub> OH)] <sup>a</sup>             | 30.3          | 2.0 x 10 <sup>-7</sup>  | 1000   | 9 / CSAPR                            | Raman                   | 18                |
| [Yb(PyrCOO)(acac) <sub>2</sub> (H <sub>2</sub> O) <sub>2</sub> ] <sup>a</sup>         | 55            | 2.1 × 10 <sup>-8</sup>  | 2000   | 8 / BTPR                             | Orbach-Direct           | 31                |
| [Yb(H <sub>3</sub> Bmshp)(DMF) <sub>2</sub> Cl <sub>2</sub> ]·DMF·1.5H <sub>2</sub> O | 14.5          | 2.38 × 10 <sup>-5</sup> | 1500   | 7 / PBPY                             | Raman-Direct            | 32                |
| [Yb(H <sub>3</sub> Bmshp)(DMF) <sub>2</sub> Cl <sub>2</sub> ]·H <sub>4</sub> Bmshp    | 43.8          | 3.83 × 10 <sup>-7</sup> | 600    | 7 / PBPY                             | Orbach-Raman-Direct     | 32                |
| [Yb(NAS) <sub>2</sub> (H <sub>2</sub> O) <sub>6</sub> ](NAS)]                         | 45            | 5.1 × 10 <sup>-8</sup>  | 1000   | 8 / SAPR                             | Raman-QTM               | 33                |
| [Yb(depma) <sub>2</sub> (H <sub>2</sub> O) <sub>6</sub> ]Cl <sub>3</sub>              | 28.9          | 4.6 × 10 <sup>-8</sup>  | 750    | 8 / TDD                              | Orbach-Raman            | 19                |
| Yb(NO <sub>3</sub> ) <sub>3</sub> ( <sup>t</sup> Bu <sub>3</sub> PO) <sub>2</sub>     | 23            | 6.8 × 10 <sup>-7</sup>  | 1000   | 8 / HPY                              | Raman-Direct            | 34                |
| [Yb(L <sup>6</sup> )(OTf) <sub>2</sub> ](OTf)                                         | 11.7          | 4.6 × 10 <sup>-6</sup>  | 1000   | 8 / TDD                              | Orbach-Raman            | 35                |

|                                                                                  |      |                        |      |            |                  |    |
|----------------------------------------------------------------------------------|------|------------------------|------|------------|------------------|----|
| [Yb(L <sup>6</sup> )(NO <sub>3</sub> ) <sub>3</sub> (MeOH)]                      | 17.8 | 8.7 × 10 <sup>-7</sup> | 1000 | 9 / JCSAPR | Orbach-Raman     | 35 |
| [Yb(18-crown-6)(H <sub>2</sub> O) <sub>3</sub> ](ClO <sub>4</sub> ) <sub>3</sub> | 5.9  | 2.6 × 10 <sup>-5</sup> | 500  | 9 / MMF    | Orbach-Raman-QTM | 36 |
| [Yb(H <sub>2</sub> O) <sub>5</sub> (NCS) <sub>3</sub> ]                          | 50   | 2.3 × 10 <sup>-8</sup> | 2500 | 8 / BTPR   | Raman            | 37 |
| [Yb(H <sub>2</sub> O)(phen) <sub>2</sub> (NCS) <sub>3</sub> ]                    | 22   | 4.5 × 10 <sup>-7</sup> | 1000 | 8 / BTPR   | Raman            | 37 |
| [Yb(H <sub>2</sub> O)(bpy) <sub>2</sub> (NCS) <sub>3</sub> ]                     | 47   | 1.7 × 10 <sup>-8</sup> | 1000 | 8 / SAPR   | Raman            | 37 |
| [Hbpy][Yb(bpy) <sub>2</sub> (NCS) <sub>4</sub> ]                                 | 44   | 2.9 × 10 <sup>-8</sup> | 1000 | 8 / SAPR   | Raman            | 37 |
| [Hbpy][Yb(phen) <sub>2</sub> (NCS) <sub>4</sub> ]                                | 37   | 8.4 × 10 <sup>-8</sup> | 1000 | 8 /SAPR    | Orbach-Raman     | 37 |

<sup>a</sup> Solvate molecules omitted.

<sup>b</sup> H<sub>3</sub>L<sup>1</sup> = tris(((2-hydroxy-3-methoxybenzyl)amino)ethyl)-amine; (L<sup>2</sup>)<sup>4-</sup> = anion of 1,4,7,10-tetraazacyclododecane-1,4,7,10-tetraacetic acid; (murex)<sup>-</sup> = murexide; L<sup>3</sup> = 4,5-ethylenedioxy-4',5'-bis(2-pyridyl-N-oxidemethylthio)tetrathiafulvalene; tta<sup>-</sup> = 2-thenoyltrifluoroacetate anion; (L<sup>4</sup>)<sup>-</sup> = anion of rhodamine-6G-2-(hydrozinomethyl)quinolin-8-ol; H<sub>3</sub>trenal = 2,2',2''-tris(salicylideneimino)triethylamine; Tpz = hydrotris(pyrazolyl)-borate; Bpz = dihydrobis(pyrazolyl)borate; DAD: (2,6-Me<sub>2</sub>C<sub>6</sub>H<sub>3</sub>NCHNC<sub>6</sub>H<sub>3</sub>Me<sub>2</sub>-2,6]<sup>2-</sup>; Cp\* = pentamethylcyclopentadiene; THF: tetrahydrofuran; (L<sup>5</sup>)<sup>-</sup> anion of 2-(tetrazol-5-yl)-1,10-phenanthroline; tmh = 2,2,6,6-tetramethylheptanoate; PyrCOO<sup>-</sup> = pyrazine-2-carboxylate; H<sub>4</sub>Bmshp = (2,6-bis[(3-methoxysalicylidene)hydrazinecarbonyl]-pyridine); NAS = 2-naphthalenesulfonate; depma = 9-diethylphosphonomethylanthracene; <sup>t</sup>Bu<sub>3</sub>PO = tritertbutylphosphine oxide; L<sup>6</sup> = 1-(1-methyl-2-((1-methyl-1H-imidazol-2-yl)methylene)hydrazineyl)-1-pyridine; OTf = triflate; 18-crown-6 = 1,4,7,10,13,16-hexaoxacyclooctadecane; bpy = 2,2'-bipyridine; phen = 1,10-phenanthroline.

<sup>c</sup> U<sub>eff</sub> values were taken from the best fit. If this fit does not include an Orbach process, then the U<sub>eff</sub> values were calculated from a simple Arrhenius equation.

<sup>d</sup> CTPR: capped trigonal prism; SAPR: square antiprism, CSAPR: spherical capped square antiprism; JCSAPR: capped square antiprism; JTCTPR tricapped trigonal prism; MFF = muffin; BTPR: bicapped trigonal prism; TDD: triangular dodecahedron; HPY hexagonal bipyramidal; PBPY: pentagonal bipyramidal; OC = octahedron; T : tetrahedron.

<sup>e</sup> references in the paper.

nd = not described.

**Table S5.** Energy ( $E$ ,  $\pm 5 \text{ cm}^{-1}$ ) and full-width-at-half maximum ( $fwhm$ ,  $\pm 5 \text{ cm}^{-1}$ ) of the  $^2F_{5/2} \rightarrow ^2F_{7/2}$  Stark components (identified from 1-4 and 1'-4') determined from the experimental emission spectrum (acquired at 11 K and excited at 360 nm) best fit ( $r^2 > 0.99$ ) using a 8-components Gaussian function for 1.2MeOH.

| Assignment* | $E$   | $fwhm$ |
|-------------|-------|--------|
| 1           | 10220 | 52     |
| 1'          | 10166 | 54     |
| 2           | 9977  | 72     |
| 2'          | 9852  | 70     |
| 3           | 9720  | 74     |
| 3'          | 9560  | 69     |
| 4           | 9419  | 66     |
| 4'          | 9250  | 65     |

\*The assignment is illustrated in Figure 7. The levels without ' correspond to unit 1.1 and those with ' to unit 1.2.

**Table S6.** Comparison of the energy differences obtain by electronic structure calculations (RASSCF/RASSI) and the luminescence studies (all in  $\text{cm}^{-1}$ ).

| Emission 1.1* | Emission 1.2** | RASSCF 1.1 | RASSCF 1.2 |
|---------------|----------------|------------|------------|
| 0             | 0              | 0          | 0          |
| 243           | 314            | 396        | 395        |
| 500           | 606            | 603        | 620        |
| 801           | 916            | 776        | 794        |

The energy values correspond to the difference between the E values (Table S5) between \* 1 and 2, and \*\* 1' and 2'.

**Table S7.**  $M_j$  Composition of the KD for 1.1 and 1.2 (all in %).

|                   | KD1         |           | KD2         |             | KD3         |             | KD4         |             |
|-------------------|-------------|-----------|-------------|-------------|-------------|-------------|-------------|-------------|
|                   | 1.1         | 1.2       | 1.1         | 1.2         | 1.1         | 1.2         | 1.1         | 1.2         |
| $ \pm 7/2\rangle$ | <b>94.3</b> | <b>95</b> | 2.8         | 2.2         | 1.3         | 1.5         | 1.6         | 1.3         |
| $ \pm 5/2\rangle$ | 0.3         | 0.2       | <b>68.5</b> | <b>69.8</b> | 13.1        | 14          | 18          | 16          |
| $ \pm 3/2\rangle$ | 2.7         | 2.3       | 20.2        | 20.4        | <b>39.3</b> | <b>37.1</b> | <b>37.9</b> | <b>40.3</b> |
| $ \pm 1/2\rangle$ | 2.7         | 2.6       | 8.5         | 7.6         | <b>46.3</b> | <b>47.5</b> | <b>42.5</b> | <b>42.3</b> |

**Table S8.** Generalised Debye model fitting parameters for **1**·2MeOH

| <b>T/K</b> | <b><math>\chi_S/(\text{cm}^3\text{mol}^{-1})</math></b> | <b><math>\chi_T/(\text{cm}^3\text{mol}^{-1})</math></b> | <b><math>\tau/(10^{-4}\text{s})</math></b> | <b><math>\alpha</math></b> |
|------------|---------------------------------------------------------|---------------------------------------------------------|--------------------------------------------|----------------------------|
| 2.30       | 0.098                                                   | 0.63                                                    | 3.86                                       | 0.15                       |
| 2.50       | 0.090                                                   | 0.57                                                    | 3.07                                       | 0.12                       |
| 2.75       | 0.083                                                   | 0.53                                                    | 2.50                                       | 0.11                       |
| 3.00       | 0.076                                                   | 0.49                                                    | 2.02                                       | 0.10                       |
| 3.25       | 0.072                                                   | 0.46                                                    | 1.64                                       | 0.08                       |
| 3.50       | 0.068                                                   | 0.43                                                    | 1.32                                       | 0.07                       |
| 3.75       | 0.065                                                   | 0.40                                                    | 1.07                                       | 0.06                       |
| 4.00       | 0.060                                                   | 0.38                                                    | 0.86                                       | 0.06                       |
| 4.25       | 0.058                                                   | 0.36                                                    | 0.70                                       | 0.05                       |
| 4.50       | 0.050                                                   | 0.34                                                    | 0.56                                       | 0.06                       |
| 4.75       | 0.046                                                   | 0.32                                                    | 0.45                                       | 0.07                       |
| 5.00       | 0.043                                                   | 0.31                                                    | 0.36                                       | 0.07                       |
| 5.25       | 0.034                                                   | 0.29                                                    | 0.30                                       | 0.08                       |
| 5.50       | 0.031                                                   | 0.28                                                    | 0.24                                       | 0.08                       |
| 5.75       | 0.016                                                   | 0.27                                                    | 0.20                                       | 0.10                       |
| 6.00       | 0.007                                                   | 0.26                                                    | 0.17                                       | 0.10                       |
